# Supplementary material for: Convicting Zika
Source: HighWire-hosted journal article supplement (doi:10.1136/bmj.i1847), 2016-04-07
Supplement: bmj.i1847.pdf [file bmj.i1847.pdf]

# A condenação do Zika

Cientistas correm para provar que o vírus da Zika causou a recente onda de casos de microcefalia na América Latina. Mas **Peter Doshi** se pergunta o que pode estar passando despercebido.

**E**m fevereiro, quando a diretora geral da Organização Mundial da Saúde, Margaret Chan, declarou uma emergência de saúde pública de importância internacional, ela o fez sem saber definitivamente se o vírus da Zika estava causando a onda de casos de microcefalia no Brasil. Segundo ela, apesar das fortes suspeitas, o vínculo ainda não tem comprovação científica.<sup>1</sup> O comitê que orienta Margaret recomendou aumento na pesquisa “para determinar se existe um vínculo causador com o vírus da Zika, outros fatores e cofatores”.<sup>2</sup> Dois meses depois, foram publicados mais de 20 novos estudos sobre as complicações neurológicas das infecções por Zika e, embora a causa dos casos de microcefalia no Brasil tecnicamente ainda não esteja desvendada, o vírus da Zika continua sendo o principal suspeito.

Uma recente revisão de coautoria de cientistas da OMS parece ter fortalecido a convicção da agência.<sup>3</sup> Com destaque para um estudo de controle de caso<sup>4</sup> da síndrome de Guillain-Barré e um estudo de coorte<sup>5</sup> descrevendo anomalias fetais entre 88 mulheres com erupção cutânea durante a gestação, a revisão afirmou que os estudos “apresentam evidências de uma ligação causal”. Mas os autores foram cautelosos: “A maioria dos dados aqui resumidos derivam de estudos cujos desenhos são tipicamente classificados como fracos, e os dados não são de todo consistentes.”<sup>3</sup> Apesar disso, as ações da OMS parecem continuar concentradas no Zika, assim como quando, em meados de fevereiro, Bruce Aylward, diretor executivo de surtos e emergências de saúde da OMS, não mediu palavras para declarar a condenação do vírus: “culpado até que se prove o contrário”.<sup>6</sup>

A enxurrada de novos estudos chegou até a convencer alguns cientistas antes críticos à pressa de definir o veredicto. Em fevereiro, Glen Armstrong, professor de microbiologia, imunologia e doenças infecciosas da Universidade de Calgary, pediu prudência nessa pressa de culpar o Zika, observando que o vínculo se baseou inteiramente em “evidências circunstanciais”.<sup>7</sup> Mas em uma entrevista ao *BMJ*, ele explicou que, embora o vínculo do Zika com a microcefalia e outros transtornos neurológicos ainda esteja na esfera

somente da correlação, “acredito que a evidência está ficando cada vez mais forte em favor da conclusão de que o vírus da Zika é, se não o único, o principal responsável”.

## Agindo face à incerteza

Como deixa clara a declaração de emergência da OMS, estabelecer qual é o agente etiológico é uma etapa importante, mas as reações da saúde pública não estão esperando comprovação. Agir diante de evidências limitadas é uma atitude tão antiga quanto a epidemiologia em si. Mais de um século atrás, em 1854, John Snow, o “pai” da epidemiologia moderna, ordenou a remoção da manivela da bomba do poço da Broad Street para proteger os cidadãos contra o cólera – muito antes de o *Vibrio cholerae* ser amplamente aceito como agente causal.

Mesmo assim, muita coisa decorre dessa suposição apressada da OMS. Caso fatores não infecciosos provem ser a causa-raiz da epidemia, ou mesmo uma contribuição, a onda de microcefalia pode rapidamente desaparecer dos holofotes públicos à medida que as nações mais ricas começarem a enxergar os trágicos eventos do Brasil como não relacionados a si mesmas.

Ainda assim, esclarecer o papel do Zika pode ser a única forma de calcular com precisão o efeito que a redução nas infecções pelo vírus da Zika teria sobre a incidência de transtornos neurológicos. A microcefalia, devemos lembrar, tem várias causas – e a Zika potencialmente é apenas uma. Segundo a OMS, aí estão incluídas infecção (como toxoplasmosse, rubéola, herpes, sífilis, citomegalovírus e HIV), exposição a agentes tóxicos, álcool, anomalias genéticas e desnutrição grave durante a gestação.<sup>8</sup>

Para complicar ainda mais a situação, os sistemas de vigilância estabelecidos podem não ser confiáveis para mensurar a verdadeira epidemiologia da microcefalia. O comitê de emergência da OMS observou que não há definição padrão para caso de vigilância para microcefalia,<sup>2</sup> e quando uma equipe brasileira recentemente reanalisou quatro anos de dados perinatais, abrangendo 16 000 nascimentos no nordeste brasileiro entre 2012 e 2015, eles descobriram uma incidência de microcefalia muito maior que a esperada – que

não só havia passado despercebida como também foi anterior à aparente entrada do vírus da Zika no Brasil, em meados de 2014.<sup>9</sup>

“A primeira questão a ser resolvida é a real incidência de microcefalia no nordeste brasileiro”, escreveram os pesquisadores. Além disso, os autores estimularam a comunidade de pesquisa a considerar outros fatores etiológicos em potencial, como desnutrição, coinfeções virais e exposição a teratogênicos, inclusive medicamentos e vacinas. Eles observaram que “a maioria dos casos reportados ocorreu em famílias de baixa renda”, um achado compatível com um recente estudo de coorte com 88 gestantes com erupção cutânea. Karin Nielsen-Saines, coautora desse estudo, contou ao *BMJ* que, embora o tamanho da amostra seja pequeno, 7 das 12 mulheres com desfechos fetais adversos foram classificadas na faixa de menor renda do estudo.

## Quando a evidência se transforma em comprovação?

Sejam quais forem as suspeitas, os diretores da OMS e os Centros de Controle e Prevenção de Doenças (CDC) dos EUA<sup>10</sup> indicaram um desejo de não divulgar o veredicto final sobre o Zika até pelo menos o início do terceiro trimestre do ano, quando poderão ser observados os efeitos neurológicos do atual surto de Zika na vizinha Colômbia. Lá, a OMS relatou mais de 20 000 casos de Zika confirmados e mais de 50 000 casos suspeitos,<sup>11</sup> e o CDC anunciou que está conduzindo dois estudos de controle de caso.<sup>10</sup>

Ao formar um veredicto final sobre o papel do Zika, a OMS indicou que pretende seguir alguma versão dos critérios de Bradford Hill para estabelecer a causalidade.<sup>3</sup> Esses critérios, mais concentrados em dados epidemiológicos que em dados laboratoriais, apresentam nove considerações para auxiliar na determinação da causalidade – inclusive especificidade e temporalidade.<sup>12</sup> Algumas pessoas podem argumentar que tais considerações são menos rigorosas que o postulado por Koch (quatro critérios baseados em dados laboratoriais que serviram como a principal referência por mais de um século), embora o comitê de emergência da OMS tenha deixado claro que essa é uma meta desejável.<sup>2</sup>

### Novas perguntas para um vírus antigo

Para um vírus documentado pela primeira vez em 1947, é surpreendente o pouco que se sabe sobre o Zika. Somente este ano os cientistas confirmaram que o Zika é neurotrópico e transmitido não só por picadas de mosquito, mas também por contato sexual humano.<sup>13</sup> Alterações no genoma viral também foram confirmadas, mas a importância das alterações para o surto atual permanece pouco clara.

“O vírus da Zika ficou no esquecimento durante vários anos. E tinha que ser assim mesmo, devo acrescentar. Se ele não era um problema, por que fazer dele um problema? Há vários vírus parecidos”, diz a virologista Leslie Lobel, do Uganda Virus Research Institute, onde fica a floresta de Zika na qual o vírus foi detectado pela primeira vez, em 1947. Leslie, que estuda o vírus do Ebola, explica que o Zika é um vírus relativamente benigno – apesar do recente surto nas Américas. Apontando para um recente estudo<sup>14</sup> que estimou o risco de microcefalia em cerca de 100 mulheres infectadas com Zika durante o primeiro trimestre da gestação, Lobel diz que o risco é “bastante baixo”. Ela diz ainda que as pessoas parecem ter se esquecido do sarampo alemão: “Se você fosse infectado [com rubéola], o risco de malformação congênita seria altíssimo.”

Ela não é a primeira a fazer a comparação. Alfonso Rodriguez-Morales, presidente da Red Colombiana de Colaboración contra el Zika (RECOLZIKA), que estuda agora o surto na Colômbia, disse à *Nature* que o risco apre-

sentado pelo Zika pode ser menor que outras causas de microcefalia, como rubéola e toxoplasmose.<sup>15</sup> Mas, em uma população sem imunidade, até riscos relativamente pequenos podem ter um impacto notável na população, fazendo a situação no Brasil ser preditiva.

Mas é aí onde moram as incertezas básicas do mistério médico. Como se pode prever o caminho futuro da epidemia sem uma sólida compreensão do papel do Zika? Nas palavras de Glen Armstrong: “O vírus da Zika poderia ser o fator desencadeante, mas pode haver outros fatores que se somam ao vírus da Zika para que se chegue à microcefalia.”

Seja qual for o caso, pode-se esperar que os riscos associados ao Zika diminuam com o tempo. Referindo-se à situação como “virologia clássica” e traçando um paralelo com o surgimento de outros vírus em populações sem exposição imunológica, Lobel disse que o que estamos vendo com o Zika é uma onda epidêmica atingir uma população sem imunidade. Assim que a população ganhar imunidade coletiva substancial pela infecção, o vírus deverá se tornar endêmico. Quando isso ocorrer, “a maioria das mulheres será infectada com pouca idade”, quando o vírus causa sintomas leves ou (mais comumente) nenhum sintoma, “de forma que estarão imunes quando atingirem a idade fértil”. E mesmo se não tiverem sido infectadas quando jovens, a imunidade coletiva substancial entre a população protegerá as outras.

Mais uma vez, Leslie menciona a rubéola. “O sarampo alemão não era um grande problema antes da vacina. Ele só se tornou

problema porque havia poucas mulheres que não o pegavam quando crianças.”

### Oportunidades em meio à tragédia

Em 31 de março, a OMS fortaleceu ainda mais as suspeitas ao anunciar “haver um sólido consenso científico” de que o vírus da Zika é causa de síndrome de Guillain-Barré, microcefalia e outros transtornos neurológicos, mas não disse haver chegado a uma conclusão oficial.<sup>16</sup> Ainda assim, sendo ou não o vírus o maior culpado, o mundo testemunha uma geração de crianças nascidas com malformações congênitas graves e deficiências que perdurarão por toda a vida, prejudicando as famílias e os sistemas de saúde que cuidarão das suas necessidades. Em meio à tragédia jaz uma rara oportunidade de saúde pública, afirma Nancy Krieger, professora de epidemiologia social da Universidade de Harvard. “Não existe forma de enfatizar mais como são rixosos os relacionamentos [entre os diferentes especialistas] que lidam com doenças infecciosas”. Observando a situação do Zika, que pode ser tanto transportado por vetor quanto transmitido sexualmente, Krieger sustenta que o vírus pode forçar os “famosos silos da saúde pública” a aprenderem a trabalhar em conjunto.

Peter Doshi, editor associado, *BMJ*  
pdoshi@bmj.com

Conflitos de interesses: Eu li e entendi a política do BMJ sobre conflitos de interesses e não tenho nada a declarar.

Procedência e revisão por pares: Validada; revisão por pares externos.

Cite this as: *BMJ* 2016;352:i1847  
<http://dx.doi.org/10.1136/bmj.i1847>
